# Supplementary material for: Inferring interiors and structural history of top-shaped asteroids from external properties of asteroid (101955) Bennu
Source: PubMed Central journal article supplement (PMC9357032; doi:10.1038/s41467-022-32288-y), 2022-08-06
Supplement: 41467_2022_32288_MOESM1_ESM.pdf [file 41467_2022_32288_MOESM1_ESM.pdf]

## SUPPLEMENTARY INFORMATION

### **Inferring interiors and structural history of top-shaped asteroids from external properties of asteroid (101955) Bennu**

**Authors:** Yun Zhang<sup>1,2</sup>, Patrick Michel<sup>1</sup>, Olivier S. Barnouin<sup>3</sup>, James H. Roberts<sup>3</sup>, Michael G. Daly<sup>4</sup>, Ronald-L. Ballouz<sup>3,5</sup>, Kevin J. Walsh<sup>6</sup>, Derek C. Richardson<sup>7</sup>, Christine M. Hartzell<sup>2</sup>, Dante S. Lauretta<sup>5</sup>

<sup>1</sup>*Université Côte d'Azur, Observatoire de la Côte d'Azur, CNRS, Laboratoire Lagrange, Nice, France.*

<sup>2</sup>*Department of Aerospace Engineering, University of Maryland, College Park, MD, USA.*

<sup>3</sup>*The Johns Hopkins University, Applied Physics Laboratory, Laurel, MD, USA.*

<sup>4</sup>*The Centre for Research in Earth and Space Science, York University, Toronto, ON, Canada.*

<sup>5</sup>*Lunar and Planetary Laboratory, University of Arizona, Tucson, AZ, USA.*

<sup>6</sup>*Southwest Research Institute, Boulder, CO, USA.*

<sup>7</sup>*Department of Astronomy, University of Maryland, College Park, MD, USA.*

*\*To whom correspondence should be addressed; Email: [yun.zhang@oca.eu](mailto:yun.zhang@oca.eu)*

## **Contents**

### **Supplementary Table**

- Supplementary Table 1

### **Supplementary Figures**

- Supplementary Figure 1
- Supplementary Figure 2
- Supplementary Figure 3
- Supplementary Figure 4
- Supplementary Figure 5
- Supplementary Figure 6

Supplementary Table 1: Material properties ( $\phi$  and  $C$ ), critical spin period ( $T_{\text{crit}}$ ), and failure mode under spinup loading of the Bennu-like rubble-pile model with different interparticle parameter sets ( $\mu_S$ ,  $\beta$ , and  $c$ ).

| $\mu_S$ | $\beta$ | $c$ (Pa) | Core density <sup>a</sup> | Structure <sup>b</sup> | $\phi$ (°) | $C$ (Pa) | $T_{\text{crit}}$ (h) <sup>c</sup> | Failure mode <sup>d</sup>      |
|---------|---------|----------|---------------------------|------------------------|------------|----------|------------------------------------|--------------------------------|
| 0.2     | 0.3     | 0        | Underdense                | Homogeneous            | 29         | 0        | 3.77                               | Types I & II <sup>e</sup>      |
| 0.2     | 0.3     | 0        | Uniform                   | Homogeneous            | 29         | 0        | 3.76                               | Types I & II                   |
| 0.2     | 0.3     | 0        | Denser                    | Homogeneous            | 29         | 0        | 3.75                               | Types I & II <sup>f</sup>      |
| 0.2     | 0.3     | 3        | Underdense                | Homogeneous            | 29         | 0.038    | 3.77                               | Types I & II                   |
| 0.2     | 0.3     | 10       | Underdense                | Homogeneous            | 29         | 0.13     | 3.74                               | Types I & II                   |
| 0.2     | 0.3     | 30       | Underdense                | Homogeneous            | 29         | 0.38     | 3.68                               | Types I & II                   |
| 0.2     | 0.3     | 50       | Underdense                | Homogeneous            | 29         | 0.65     | 3.62                               | Types I & II                   |
| 0.2     | 0.3     | 60       | Underdense                | Homogeneous            | 29         | 0.78     | 3.58                               | Type II <sup>g</sup>           |
| 0.2     | 0.3     | 100      | Underdense                | Homogeneous            | 29         | 1.3      | 3.47                               | Type II                        |
| 0.2     | 0.3     | 400      | Underdense                | Homogeneous            | 29         | 5.2      | 2.93                               | Type IV                        |
| 0.2     | 0.3     | 800      | Underdense                | Homogeneous            | 29         | 10       | 2.51                               | Type IV <sup>k</sup>           |
| 0.2     | 0.3     | 1000     | Underdense                | Homogeneous            | 29         | 13       | 2.34                               | Type IV                        |
| 0.4     | 0.4     | 0        | Underdense                | Homogeneous            | 32         | 0        | 3.53                               | Types I, II & III <sup>h</sup> |
| 0.4     | 0.4     | 0        | Uniform                   | Homogeneous            | 32         | 0        | 3.52                               | Types I, II & III              |
| 0.4     | 0.4     | 0        | Denser                    | Homogeneous            | 32         | 0        | 3.52                               | Types I, II & III              |
| 0.6     | 0.5     | 0        | Underdense                | Homogeneous            | 35         | 0        | 3.46                               | Types I & III <sup>i</sup>     |
| 0.6     | 0.5     | 0        | Uniform                   | Homogeneous            | 35         | 0        | 3.46                               | Types I & III                  |
| 0.6     | 0.5     | 0        | Denser                    | Homogeneous            | 35         | 0        | 3.46                               | Types I & III                  |
| 0.6     | 0.5     | 3        | Underdense                | Homogeneous            | 35         | 0.11     | 3.44                               | Types I & III                  |
| 0.6     | 0.5     | 10       | Underdense                | Homogeneous            | 35         | 0.35     | 3.41                               | Types I & III                  |
| 0.6     | 0.5     | 50       | Underdense                | Homogeneous            | 35         | 1.7      | 3.31                               | Types I & III                  |
| 0.6     | 0.5     | 100      | Underdense                | Homogeneous            | 35         | 3.5      | 3.02                               | Types II & III                 |
| 0.6     | 0.5     | 300      | Underdense                | Homogeneous            | 35         | 11       | 2.50                               | Type IV                        |
| 1.0     | 0.8     | 0        | Underdense                | Homogeneous            | 40         | 0        | 3.42                               | Types I & III <sup>j</sup>     |
| 1.0     | 0.8     | 0        | Uniform                   | Homogeneous            | 40         | 0        | 3.43                               | Types I & III                  |
| 1.0     | 0.8     | 0        | Denser                    | Homogeneous            | 40         | 0        | 3.44                               | Types I & III                  |
| 1.0     | 0.8     | 3        | Underdense                | Homogeneous            | 40         | 0.30     | 3.40                               | Types I & III                  |
| 1.0     | 0.8     | 10       | Underdense                | Homogeneous            | 40         | 1.0      | 3.32                               | Types I & III                  |

Continuation of Table 1

| $\mu_S$ | $\beta$ | $c$ (Pa) | Core density <sup>a</sup> | Structure <sup>b</sup> | $\phi$ (°) | $C$ (Pa) | $T_{\text{crit}}$ (h) <sup>c</sup> | Failure mode <sup>d</sup>      |
|---------|---------|----------|---------------------------|------------------------|------------|----------|------------------------------------|--------------------------------|
| 1.0     | 0.8     | 50       | Underdense                | Homogeneous            | 40         | 5.4      | 2.88                               | Types II & III                 |
| 1.0     | 0.8     | 100      | Underdense                | Homogeneous            | 40         | 11       | 2.57                               | Type IV                        |
| 1.0     | 0.8     | 200      | Underdense                | Homogeneous            | 40         | 22       | 2.15                               | Type IV                        |
| 0.2     | 0.3     | 60       | Underdense                | Layered                | 29         | 0.78     | 3.58                               | Types I & II                   |
| 0.2     | 0.3     | 80       | Underdense                | Layered                | 29         | 1.0      | 3.54                               | Types I & II <sup>l</sup>      |
| 0.2     | 0.3     | 100      | Underdense                | Layered                | 29         | 1.3      | 3.49                               | Types I, II & III <sup>m</sup> |
| 0.2     | 0.3     | 200      | Underdense                | Layered                | 29         | 2.6      | 3.48                               | Types I & III <sup>n</sup>     |
| 0.2     | 0.3     | 400      | Underdense                | Layered                | 29         | 5.2      | 3.48                               | Types I & III                  |
| 0.2     | 0.3     | 800      | Underdense                | Layered                | 29         | 10       | 3.48                               | Types I & III                  |
| 0.2     | 0.3     | 800      | Underdense                | Heterogeneous          | 29         | 10       | 3.57                               | Types I & II                   |
| 0.2     | 0.3     | 8000     | Underdense                | Heterogeneous          | 29         | 100      | 3.56                               | Types I & II <sup>o</sup>      |
| 0.4     | 0.4     | 4300     | Underdense                | Heterogeneous          | 32         | 100      | 3.35                               | Types I, II & III              |
| 0.6     | 0.5     | 2800     | Underdense                | Heterogeneous          | 35         | 100      | 3.28                               | Types I & III <sup>p</sup>     |
| 1.0     | 0.8     | 900      | Underdense                | Heterogeneous          | 40         | 100      | 3.24                               | Types I & III                  |

<sup>a</sup> The centre 100-meter-radius region of the rubble-pile model is assigned a density lower than (“Underdense”;  $\rho_{\text{inter}} = 0.8\rho_{\text{outer}}$ ), equal to (“Uniform”;  $\rho_{\text{inter}} = \rho_{\text{outer}}$ ), or higher than (“Denser”;  $\rho_{\text{inter}} = 1.2\rho_{\text{outer}}$ ) the density of the outer region.

<sup>b</sup> All rubble piles use the same  $\mu_S$  and  $\beta$  to solve the contact interactions for all constituent particles (Methods Section Soft-sphere discrete element method). A homogeneous structure also uses the same  $c$  overall for the body, while a layered structure has a 25-meter-depth surface layer with  $c = 0$  Pa and a cohesive interior with  $c$  given in the third column. A heterogeneous structure has five cohesive regions with the given  $c$  in the third column and a cohesionless matrix (see Fig. 5a).

<sup>c</sup> The critical spin period is measured at the point when the body’s longest axis length has changed by 1.5%. As this pronounced change in the appearance lags behind the structural failure, this value is slightly shorter than the actual critical spin period (ref. <sup>51</sup>).

Continuation of Table 1

| $\mu_S$ | $\beta$ | $c$ (Pa) | Core density <sup>a</sup> | Structure <sup>b</sup> | $\phi$ (°) | $C$ (Pa) | $T_{\text{crit}}$ (h) <sup>c</sup> | Failure mode <sup>d</sup> |
|---------|---------|----------|---------------------------|------------------------|------------|----------|------------------------------------|---------------------------|
|---------|---------|----------|---------------------------|------------------------|------------|----------|------------------------------------|---------------------------|

<sup>d</sup> Type I: local surface landslides, where at least one surface particle having displacement >1 m is detected during spinup; Type II: internal deformation, where changes in the shortest-to-longest axis ratio of the rubble-pile interior exceed 3% (i.e., the 1.5% changes in axis lengths at the end of spinup can be attributed to the deformation of the internal structure; excluding the cases having Type IV failure mode); Type III: surface mass shedding, where at least one surface particle is lofted above the surface (excluding the cases having Type IV failure mode); Type IV: tensile disruption, where surface fracture lineaments are detected during structural reconfiguration (see Supplementary Movies 1–12 for examples of these four failure behaviours).

<sup>e</sup> The structural evolution of this case is presented in Supplementary Movie 1.

<sup>f</sup> See Supplementary Movie 2.

<sup>g</sup> See Supplementary Movie 3.

<sup>h</sup> See Supplementary Movie 4.

<sup>i</sup> See Supplementary Movie 5.

<sup>j</sup> See Supplementary Movie 6.

<sup>k</sup> See Supplementary Movie 7.

<sup>l</sup> See Supplementary Movie 8.

<sup>m</sup> See Supplementary Movie 9.

<sup>n</sup> See Supplementary Movie 10.

<sup>o</sup> See Supplementary Movie 11.

<sup>p</sup> See Supplementary Movie 12.

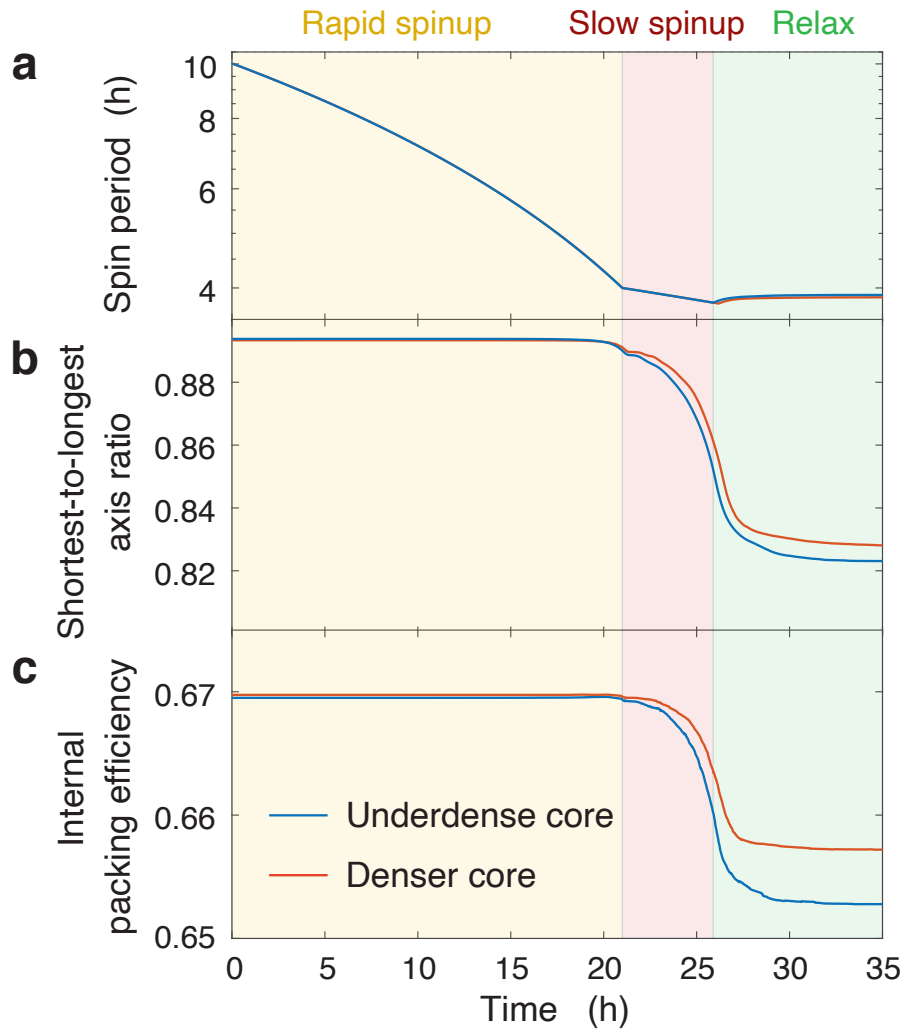

Supplementary Figure 1: **YORP-induced spinup evolution of the Bennu-shaped rubble-pile model with  $\phi = 29^\circ$  and  $C = 0$  Pa.** The rubble pile is forced to rotate following the predefined spin period, including rapid and slow spinup stages (Panel **a**). When the longest axis length has changed by 1.5%, the spinup ceases, and the body evolves under its self-gravity. The spinup process leads to a more oblate shape (Panel **b**) and a lower internal packing efficiency (Panel **c**). Supplementary Movies 1–2 visualise this process. The results for different internal density distributions are denoted in different colours as indicated in the legend. Both cases can generate a more dilute core, supporting the idea that Bennu’s underdense core could be formed through such internal deformation processes regardless of the initial density distribution. Source data are provided as a Source Data file.

Homogeneous structure,  $C = 0$  Pa:

$\times \phi = 35^\circ (T_{\text{crit}} = 3.46 \text{ h})$     $+$   $\phi = 40^\circ (T_{\text{crit}} = 3.42 \text{ h})$

Layered structure,  $\phi = 29^\circ$  :

$\triangle C = 1.3 \text{ Pa} (T_{\text{crit}} = 3.49 \text{ h})$     $\diamond C = 2.6 \text{ Pa} (T_{\text{crit}} = 3.48 \text{ h})$     $\circ C = 10 \text{ Pa} (T_{\text{crit}} = 3.48 \text{ h})$

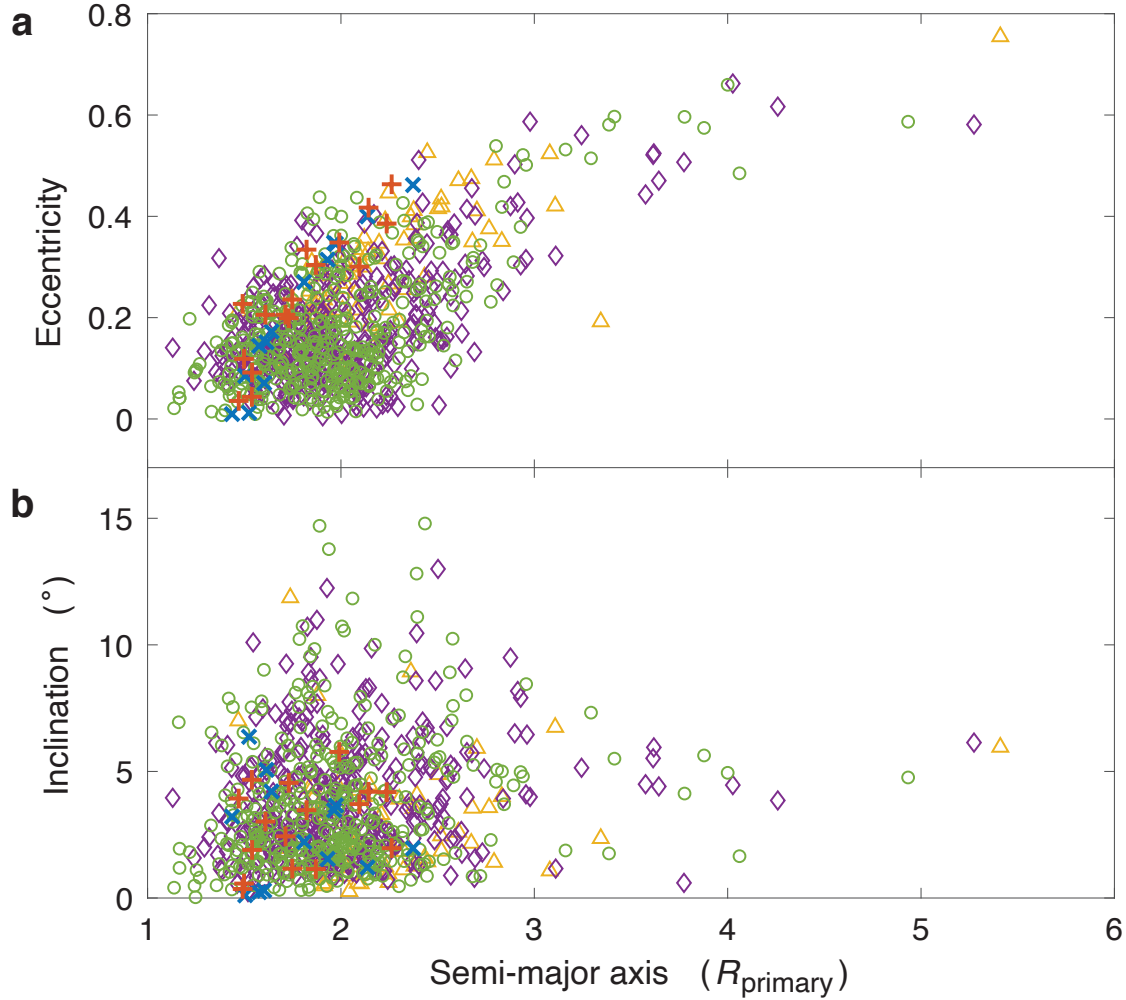

Supplementary Figure 2: **Orbital elements of YORP-induced ejecta around the Bennu-shaped rubble-pile model.** **a**, orbital eccentricity; **b**, orbital inclination. The semi-major axis is expressed as a ratio relative to the equatorial radius of the primary  $R_{\text{primary}}$ . The symbols denote the results for tests with different friction angles  $\phi$  and cohesive strength  $C$ , as indicated on the top. The results are recorded at the moment 40 h after the initial structural failure for each case. Source data are provided as a Source Data file.

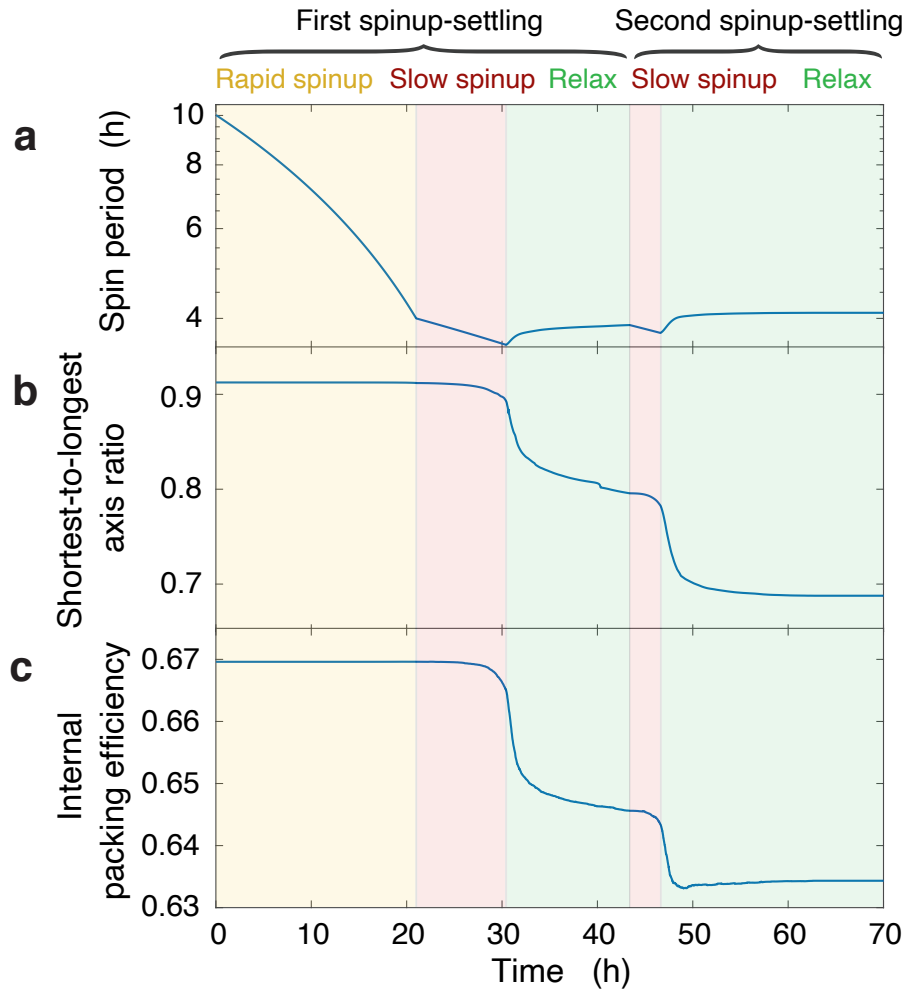

Supplementary Figure 3: **Structural evolution of a heterogeneous rubble pile with  $\phi = 29^\circ$  and  $C = 0$  Pa undergoing two consecutive spinup-settling paths.** **a**, spin period; **b**, axis ratio; **c**, internal packing efficiency. During each path, the spinup ceases when the longest axis length has changed by 1.5%, and the body evolves under its self-gravity (see Supplementary Movie 11). The failure behaviours during these two paths are identical, showing that consecutive YORP-spinup cycles could lead a rubble pile to a more oblate shape with a more dilute core. Source data are provided as a Source Data file.



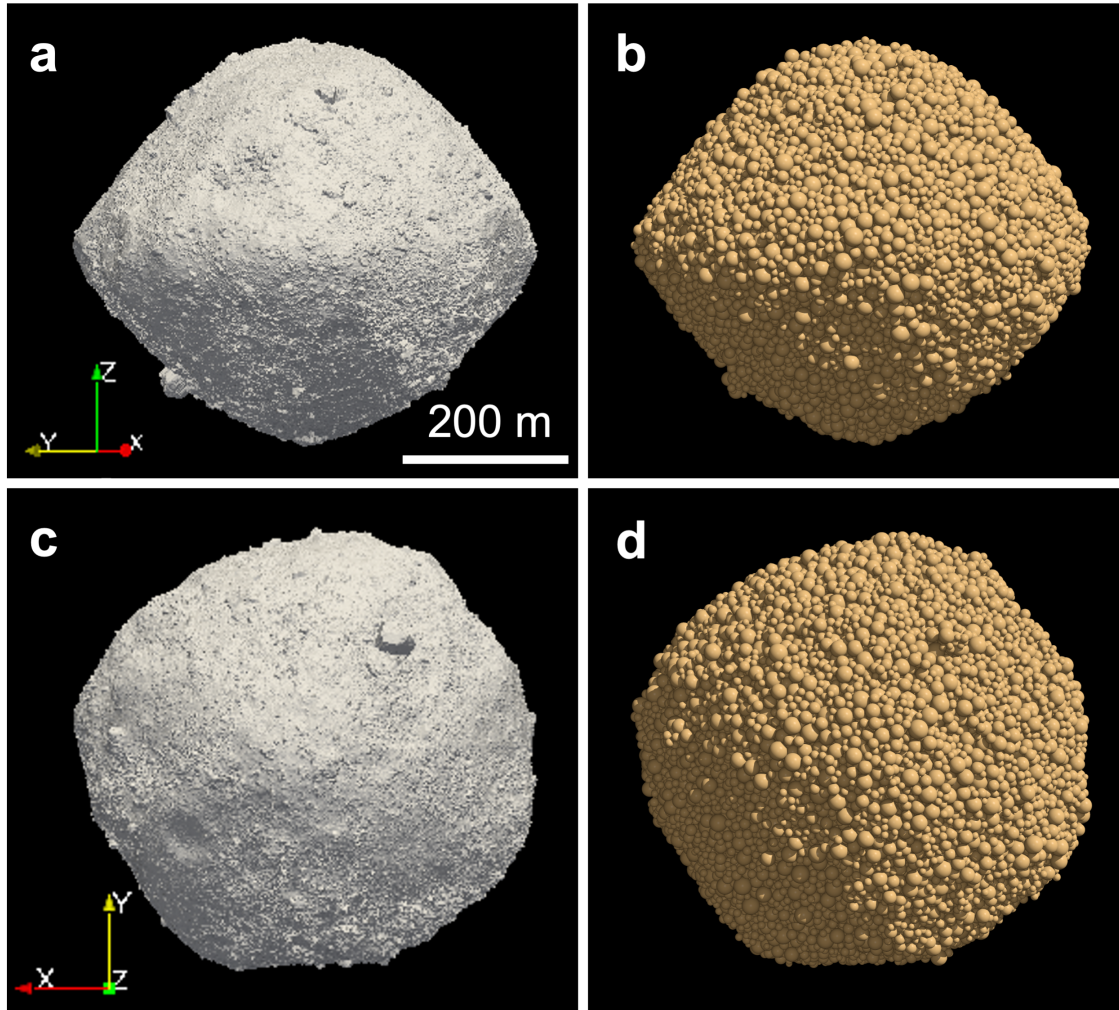

Supplementary Figure 4: **Comparisons of the Bennu OSIRIS-REx Laser Altimeter (OLA) shape model (a, c) and the corresponding rubble-pile model used in this study (b, d).** The top and bottom panels present the top view and side view, respectively. The OLA shape model (v20) is available from the Small Body Mapping Tool (SBMT) at <https://sbmt.jhuapl.edu/Object-Template.php?obj=77>.

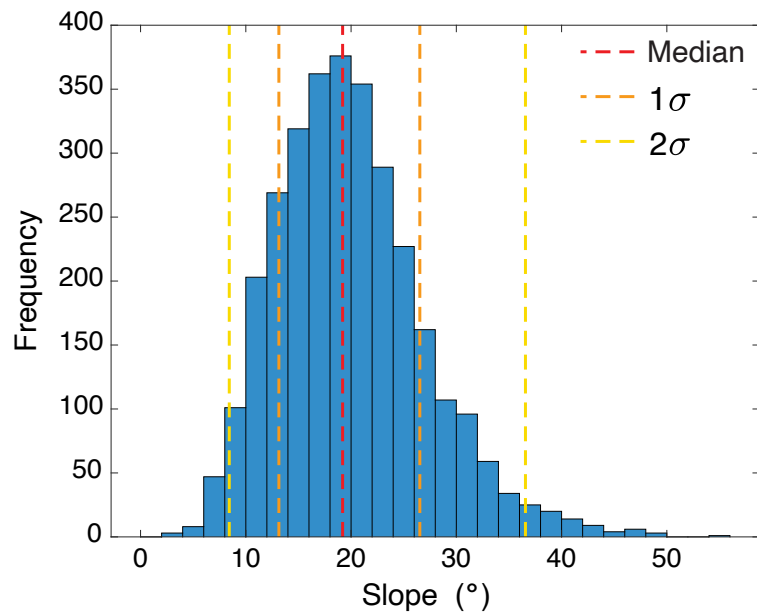

Supplementary Figure 5: **Surface slope distribution of the Bennu-shaped rubble-pile model at Bennu’s current spin period of  $T = 4.296$  h.** The surface slope is calculated for top-surface particles using Eq. (8) (see Methods). The width of each bin is  $2^\circ$ . Source data are provided as a Source Data file.

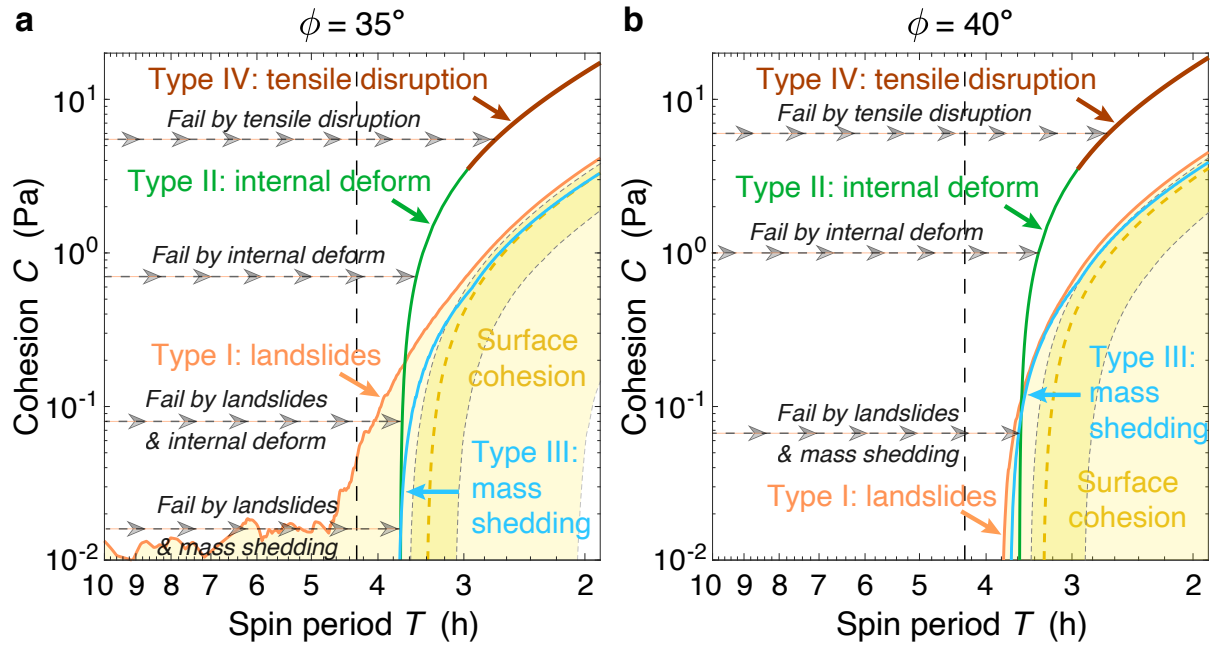

Supplementary Figure 6: **Benu-shaped cohesive rubble-pile failure mode diagram.** Similar to Fig. 3b, but for  $\phi = 35^\circ$  (a) and  $\phi = 40^\circ$  (b). At Benu's current spin period (as indicated by the black vertical dashed line), surface mass movement is suppressed in the case of  $\phi = 35^\circ$  for  $C \gtrsim 0.05$  Pa and in the case of  $\phi = 40^\circ$  without any cohesion. Source data are provided as a Source Data file.
